# Supplementary material for: Crossword puzzles for chemistry education: learning goals beyond vocabulary
Source: Royal Society of Chemistry journal article supplement (doi:10.1039/c6rp00018e), 2016-01-01
Supplement: c6rp00018e1.pdf [file c6rp00018e1.pdf]

## Appendix 1: Ionic Equilibria crossword puzzle

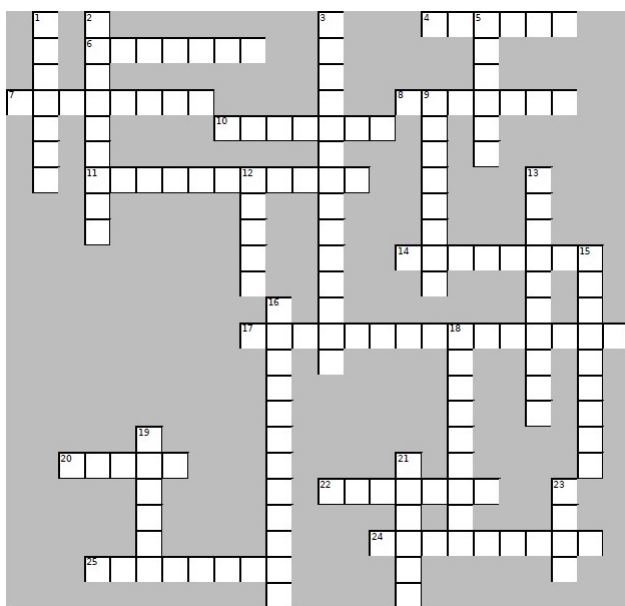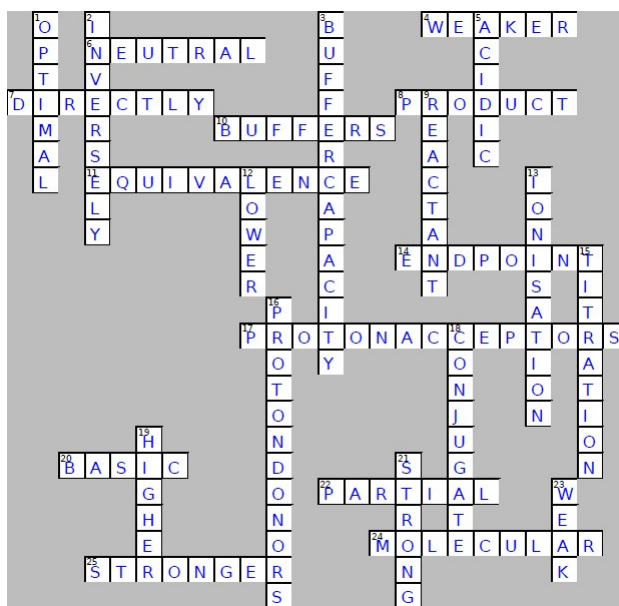

### Across:

4. The stronger the acid, the \_\_\_\_\_ its conjugate base.
6. Salts of strong bases and strong acids produce \_\_\_\_\_ solutions.
7. Base strength is \_\_\_\_\_ proportional to the basicity constant  $K_b$ .
8. Strong acid hydrolysis is \_\_\_\_\_ dominant.
10. Solutions that resist a change in pH when small amounts of strong acid or base are added.
11. The theoretical point in a titration, at which the amounts of the reactants are equivalent.
14. The experimental estimate of the equivalence point in a titration.
17. Bases are molecules or ions that are \_\_\_\_\_. (two words)
20. Salts of weak acids and strong bases produce \_\_\_\_\_ solutions.
22. A buffer is prepared by \_\_\_\_\_ neutralisation, when a limiting amount of strong base is added to an excess amount of weak acid.
24. For good absorption, a substance needs to be in its \_\_\_\_\_ form to be able to cross cellular barriers.
25. Base A ( $pK_b$  3.5) is \_\_\_\_\_ than base B ( $pK_b$  5.2).

### Down:

1. Level of buffering occurring when the ratio b/a (amounts of base (b) and its conjugate acid (a)) equals 1.
2. Acid strength is \_\_\_\_\_ proportional to  $pK_a$ .
3. The measure of the amount of protons (or hydroxide ions) a buffer can absorb without a significant change in pH. (two words)
5. Salts of weak bases and strong acids produce \_\_\_\_\_ solutions.
9. Weak base hydrolysis is \_\_\_\_\_ dominant.
12. In the titration of a weak base with a strong acid, the pH of the stoichiometric point is \_\_\_\_\_ than 7.
13. For weak acids and bases, the more dilute the solution the greater its extent of \_\_\_\_\_.
15. Adding a titrant solution (with an accurately known concentration) from a burette to a flask containing the sample of an analyte.
16. Acids are molecules or ions that are \_\_\_\_\_. (two words)
18. For a \_\_\_\_\_ acid/base pair:  $pK_a + pK_b = 14$
19. A buffer with \_\_\_\_\_ concentrations of the constituents will have a greater buffer capacity.
21. Acids and bases that are effectively completely ionised in water.
23. Acids and bases that ionise in water to a slight extent (<5-10%).

## Appendix 2: Phase Equilibria crossword puzzle

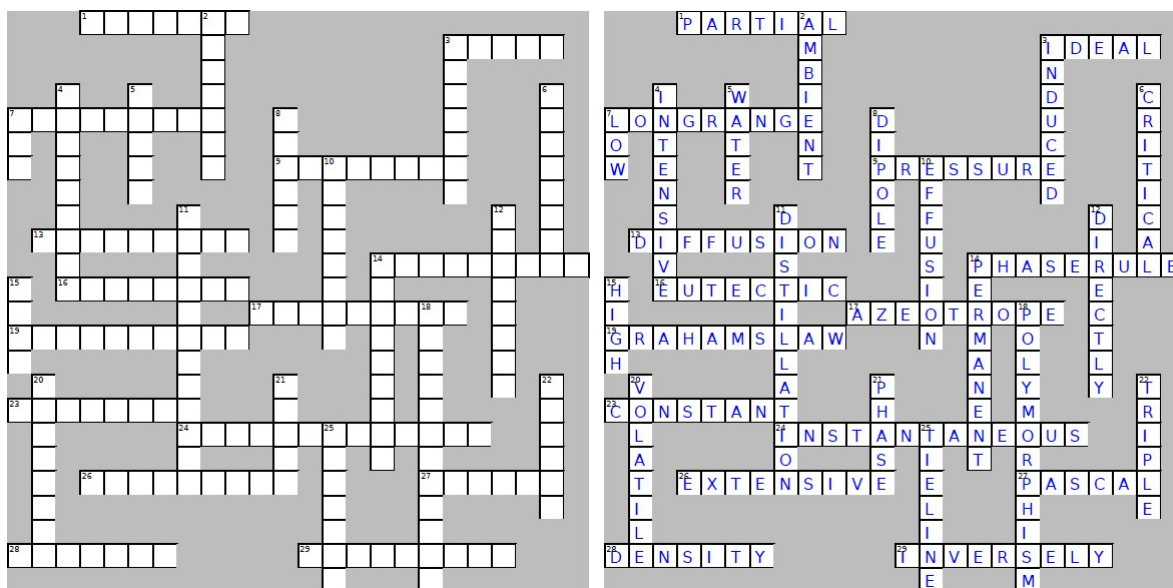

### Across:

1. The pressure that the gas would exert if it occupied the container alone.
2. A gas whose behaviour follows the relationship:  $PV = nRT$ .
7. Crystalline solids exhibit \_\_\_\_\_ order. (two words)
9. Measure of force per unit area.
13. A gradual dispersal of one substance through another substance.
14.  $F = C - P + 2$ , where  $F$  = degrees of freedom,  $C$  = number of components,  $P$  = number of phases. (two words)
16. A mixture of two solids, which has a melting point lower than the melting point of either solid.
17. A mixture of compounds that boils with a constant composition.
19. At constant temperature, the rate of effusion of a gas is inversely proportional to the square root of its molar mass. (two words)
23. All systems prepared on a tie line separate into two phases of \_\_\_\_\_ compositions.
24. Non-polar compounds possess \_\_\_\_\_ dipoles.
26. Volume is an \_\_\_\_\_ property.
27. SI unit of pressure.
28. A unique property of water that causes the negative slope of the solid/liquid boundary on its phase diagram.
29. The volume of a quantity of gas is \_\_\_\_\_ proportional to pressure at constant temperature.

### Down:

2. 25 degrees Celsius is a standard \_\_\_\_\_ temperature.
3. A disruption of an electron cloud on a neighbouring molecule leads to \_\_\_\_\_ dipoles.
4. Temperature is an \_\_\_\_\_ property.
5. Solids are of greater density than liquids. Exception?
6. The point on a single component phase diagram, where there ceases to be any difference between liquid and gas phases.
7. Real gasses obey The Ideal Gas Law at \_\_\_\_\_ pressure.
8. Two partially charged particles (or parts of a structure) of opposite sign which are separated by a finite distance.
10. The process of a gas passing through a small hole into a vacuum.
11. The process of separating compounds with different boiling points.
12. The pressure of a fixed amount of gas is \_\_\_\_\_ proportional to its temperature at constant volume.
14. Polar molecules possess \_\_\_\_\_ dipoles.

- 15. Real gasses behave in ideal manner at \_\_\_\_ temperature.
- 18. The existence of at least two different crystal structures for the same substance.
- 20. The greater the vapour pressure, the more \_\_\_\_\_ the compound and the weaker the intermolecular forces in the liquid.
- 21. A form of matter that is uniform throughout in both chemical composition and physical state.
- 22. The point on a single component phase diagram, where three phases can co-exist in dynamic equilibrium.
- 25. A horizontal line drawn across the region of two phases.

### Appendix 3: Chemical Kinetics crossword puzzle

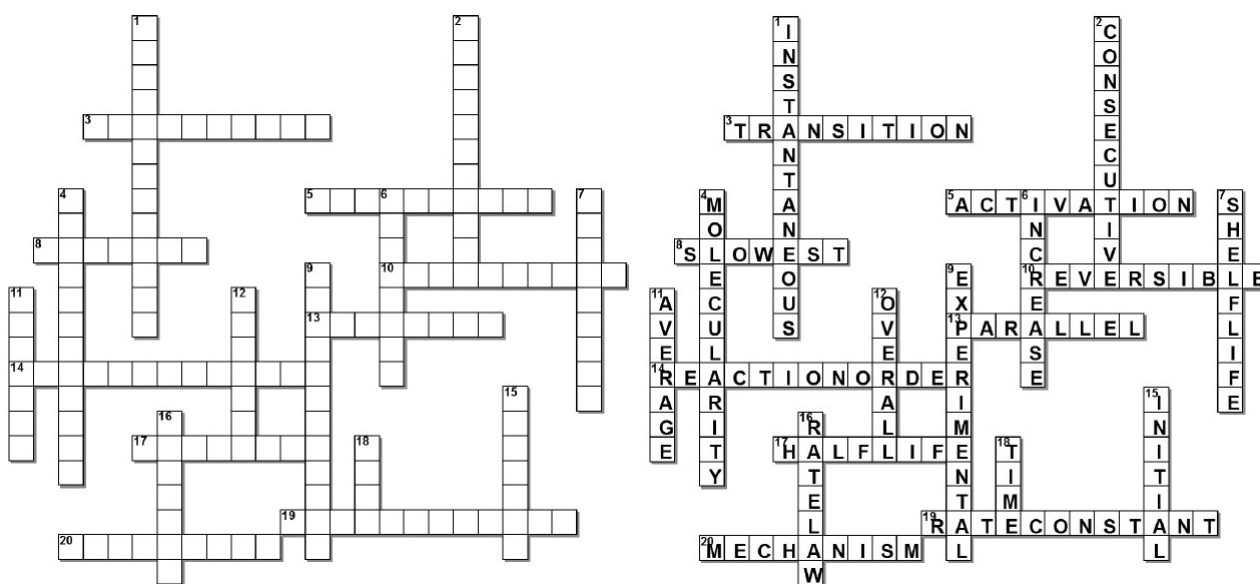

#### Across:

3. \_\_\_\_\_ state – a combination of molecules, which is not a molecule in its own right.
5. Chemical reactions must go over an energy barrier - \_\_\_\_\_ energy - before a reaction can take place.
8. Rate-determining step – the \_\_\_\_\_ elementary step of a multi-step process.
10. Any reaction that can exist at equilibrium is a \_\_\_\_\_ reaction.
13. A reaction where a reactant either forms a product via two different mechanistic pathways or forms two (or more) different products.
14. Exponents **x** in a rate law: **rate = k [A]<sup>x</sup>** (two words)
17. The time (from the beginning of a reaction) it takes for the concentration of a reactant to decrease by half of its original value.
19. Proportionality constant **k** in a rate law: **rate = k [A]<sup>x</sup>** (two words)
20. Sequence of steps by which a reaction occurs.

#### Down:

1. Rate at a particular moment in time.
2. A reaction, in which the product from the 1<sup>st</sup> step becomes the reactant for the 2<sup>nd</sup> step, and so on.
4. The number of molecules that come together in an elementary step.
6. Catalysts – species which \_\_\_\_\_ the rate of chemical reactions by lowering the activation energy.
7. The time from the manufacture or preparation until the original potency or content of active ingredient has been reduced by 10%.
9. Rate Laws are derived from \_\_\_\_\_ observations on the macroscopic level.
11. Rate over a certain time interval.
12. Order reflects the \_\_\_\_\_ change in going from reactants to products.
15. Rate at the beginning of the reaction.
16. The relationship between the reactant concentrations and the chemical rate. (two words)
18. Rate is a change (in a property) over \_\_\_\_\_.

#### Appendix 4: Meaning of terms used in thermodynamics<sup>a</sup>

| Term <sup>b</sup> | Everyday language / common usage                                                                                                                                                                                                                                                                                                                                                                                                                                                   | Context-specific scientific language                                                                                                                                | Clue(s)<br>(Figure 1) |
|-------------------|------------------------------------------------------------------------------------------------------------------------------------------------------------------------------------------------------------------------------------------------------------------------------------------------------------------------------------------------------------------------------------------------------------------------------------------------------------------------------------|---------------------------------------------------------------------------------------------------------------------------------------------------------------------|-----------------------|
| bond              | <ul style="list-style-type: none"> <li>A thing used to tie something or to fasten things together</li> <li>An agreement with legal force</li> </ul>                                                                                                                                                                                                                                                                                                                                | Bond is a strong force of attraction holding atoms together in a molecule or crystal, resulting from the sharing or transfer of electrons                           | 12 down               |
| <b>capacity</b>   | <ul style="list-style-type: none"> <li>The maximum amount that something can contain or produce</li> <li>The ability or power to do or understand something</li> <li>A specified role or position</li> </ul>                                                                                                                                                                                                                                                                       | Heat capacity is the ratio of heat supplied to the rise in temperature produced.                                                                                    | 22 across             |
| condensed         | <ul style="list-style-type: none"> <li>Made denser or more concise; compressed or concentrated</li> </ul>                                                                                                                                                                                                                                                                                                                                                                          | Condensed phase is a solid or liquid phase, not a gas.                                                                                                              | 5 down                |
| decomposition     | <ul style="list-style-type: none"> <li>The state or process of rotting; decay</li> </ul>                                                                                                                                                                                                                                                                                                                                                                                           | Decomposition is reaction in which a substance is broken down into simpler substances.                                                                              | 21 across             |
| <b>element</b>    | <ul style="list-style-type: none"> <li>An essential or characteristic part of something abstract</li> <li>Any of the four substances (earth, water, air, and fire) regarded as the fundamental constituents of the world in ancient and medieval philosophy</li> <li>A person's or animal's natural or preferred environment</li> <li>A part in an electric kettle, heater, or cooker which contains a wire through which an electric current is passed to provide heat</li> </ul> | Element is (i) a substance that cannot be separated into simpler components by chemical techniques; (ii) a substance consisting of atoms of the same atomic number. | 8 down                |
| formation         | <ul style="list-style-type: none"> <li>The action of forming or process of being formed</li> <li>A group of people or things in a particular arrangement or pattern</li> </ul>                                                                                                                                                                                                                                                                                                     | Standard enthalpy of formation refers to the formation of a substance from its elements in their most stable form.                                                  | 21 across<br>8 down   |
| spontaneous       | <ul style="list-style-type: none"> <li>Performed or occurring as a result of a sudden impulse or inclination and without premeditation or external stimulus</li> <li>Having an open, natural, and uninhibited manner</li> </ul>                                                                                                                                                                                                                                                    | Occurring without needing to be driven by an external influence.                                                                                                    | 16 across<br>19 down  |
| state             | <ul style="list-style-type: none"> <li>A nation or territory considered as an organized political community under one government</li> <li>The civil government of a country</li> </ul>                                                                                                                                                                                                                                                                                             | State function is a property of a substance that is independent of how the sample was prepared.<br>State of matter is the physical condition a sample.              | 7 across              |
| surroundings      | <ul style="list-style-type: none"> <li>The things and conditions around a person or thing</li> </ul>                                                                                                                                                                                                                                                                                                                                                                               | Surroundings is the region outside a system, where observations are made.                                                                                           | 14 down               |
| universe          | <ul style="list-style-type: none"> <li>A particular sphere of activity or experience</li> <li>All existing matter and space considered as a whole</li> </ul>                                                                                                                                                                                                                                                                                                                       | Universe is the system and its surroundings.                                                                                                                        | 18 across<br>14 down  |

<sup>a</sup> Definitions are from the Oxford Dictionary. Where scientific definitions are not available in the Oxford Dictionary, definitions from the prescribed textbook were used (Atkins P. W., Jones L. and Laverman L., (2013), *Chemical principles : the quest for insight*, New York: W H Freeman). <sup>b</sup> Similar or identical terms with different technical meanings in different contexts are shown in bold.

## Appendix 5: Meanings of terms used in ionic equilibria<sup>a</sup>

| Term <sup>b</sup> | Everyday language / common usage                                                                                                                                                                                                                                                                                                             | Context-specific scientific language                                                                                                           | Clue(s)<br>(Figure S1)                        |
|-------------------|----------------------------------------------------------------------------------------------------------------------------------------------------------------------------------------------------------------------------------------------------------------------------------------------------------------------------------------------|------------------------------------------------------------------------------------------------------------------------------------------------|-----------------------------------------------|
| <b>acceptor</b>   | <ul style="list-style-type: none"> <li>A person or thing that accepts or receives something</li> <li>An atom or molecule which is able to bind to or accept an electron or other species</li> </ul>                                                                                                                                          | A base is a proton acceptor (Brønsted-Lowry theory).                                                                                           | 17 across                                     |
| <b>capacity</b>   | <ul style="list-style-type: none"> <li>The maximum amount that something can contain or produce</li> <li>The ability or power to do or understand something</li> <li>A specified role or position</li> </ul>                                                                                                                                 | Buffer capacity is an indication of the amount of acid or base that can be added before a buffer loses its ability to resist the change in pH. | 3 down                                        |
| dominant          | <ul style="list-style-type: none"> <li>Having power and influence over others</li> </ul>                                                                                                                                                                                                                                                     | Indicating a position of equilibrium: product-dominant (prevalence of product(s)), reactant-dominant (prevalence of reactant(s)).              | 8 across<br>9 down                            |
| <b>donor</b>      | <ul style="list-style-type: none"> <li>A person who donates something, especially money to charity</li> <li>A person who provides blood, an organ, or semen for transplantation, transfusion, etc.</li> <li>An atom or molecule that provides a pair of electrons in forming a coordinate bond</li> </ul>                                    | An acid is a proton donor (Brønsted-Lowry theory).                                                                                             | 16 down                                       |
| limit/limiting    | <ul style="list-style-type: none"> <li>A point or level beyond which something does not or may not extend or pass</li> <li>A restriction on the size or amount of something permissible or possible</li> </ul>                                                                                                                               | Limiting reagent is the reactant that governs the theoretical yield of product in a given reaction.                                            | 22 across                                     |
| <b>strength</b>   | <ul style="list-style-type: none"> <li>The quality or state of being physically strong</li> <li>The capacity of an object or substance to withstand great force or pressure</li> <li>The potency or degree of concentration of a drug, chemical, or drink</li> <li>A good or beneficial quality or attribute of a person or thing</li> </ul> | Strong acids and bases are acids and bases that are fully deprotonated or protonated, respectively, in solution.                               | 4, 7, 8, 25<br>across<br>2, 9, 21,<br>23 down |

<sup>a</sup> Definitions are from the Oxford Dictionary. Where scientific definitions are not available in the Oxford Dictionary, definitions from the prescribed textbook were used (Atkins P. W., Jones L. and Laverman L., (2013), *Chemical principles : the quest for insight*, New York: W H Freeman). <sup>b</sup> Similar or identical terms with different technical meanings in different contexts are shown in bold.

## Appendix 6: Meanings of terms used in phase equilibria<sup>a</sup>

| Term <sup>b</sup>    | Everyday language / common usage                                                                                                                                                                                                                                                                  | Context-specific scientific language                                                                                                        | Clue(s)<br>(Figure S2) |
|----------------------|---------------------------------------------------------------------------------------------------------------------------------------------------------------------------------------------------------------------------------------------------------------------------------------------------|---------------------------------------------------------------------------------------------------------------------------------------------|------------------------|
| critical             | <ul style="list-style-type: none"> <li>Expressing adverse or disapproving comments or judgements</li> <li>Expressing or involving an analysis of the merits and faults of a work of literature, music, or art</li> <li>Having the potential to become disastrous; at a point of crisis</li> </ul> | Relating to or denoting a point of transition from one state to another.                                                                    | 6 down                 |
| dynamic              | <ul style="list-style-type: none"> <li>(Of a process or system) characterized by constant change, activity, or progress</li> <li>(Of a person) positive in attitude and full of energy and new ideas</li> </ul>                                                                                   | Dynamic equilibrium is the condition in which a forward process and its reverse are taking place simultaneously at equal rates.             | 22 down                |
| extensive            | <ul style="list-style-type: none"> <li>Covering or affecting a large area; large in amount or scale</li> </ul>                                                                                                                                                                                    | Extensive (property) is a physical property that depends on the size of the sample.                                                         | 26 across              |
| ideal                | <ul style="list-style-type: none"> <li>Satisfying one's conception of what is perfect</li> <li>Existing only in the imagination; desirable or perfect but not likely to become a reality</li> </ul>                                                                                               | Ideal gas is a gas that satisfies the ideal gas law and is described by a kinetic model.                                                    | 2 across               |
| <b>instantaneous</b> | <ul style="list-style-type: none"> <li>Occurring or done instantly</li> </ul>                                                                                                                                                                                                                     | Instantaneous dipole moment is a dipole moment that arises from a transient distribution of charge and is responsible for the London force. | 24 across              |
| intensive            | <ul style="list-style-type: none"> <li>Concentrated on a single subject or into a short time; very thorough or vigorous</li> <li>Achieving maximum production with limited resources</li> <li>Concentrating on or making much use of a specified thing</li> </ul>                                 | Extensive (property) is a physical property that is independent of the size of the sample.                                                  | 4 down                 |
| phase                | <ul style="list-style-type: none"> <li>A distinct period or stage in a process of change or forming part of something's development</li> </ul>                                                                                                                                                    | Phase is a specific physical state of matter. In certain cases, some substances can exist in more than one solid or liquid phase.           | 21 down                |
| tie                  | <ul style="list-style-type: none"> <li>Attach or fasten with string or similar cord</li> <li>Restrict or limit (someone) to a particular situation or place</li> <li>Connect; link</li> <li>Achieve the same score or ranking as another competitor or team</li> </ul>                            | Tie line – a horizontal line drawn across the region of two phases.                                                                         | 25 down                |
| volatile             | <ul style="list-style-type: none"> <li>(Of a person) liable to display rapid changes of emotion</li> </ul>                                                                                                                                                                                        | (Of a substance) easily evaporated at ambient temperature.                                                                                  | 20 down                |

<sup>a</sup> Definitions are from the Oxford Dictionary. Where scientific definitions are not available in the Oxford Dictionary, definitions from the prescribed textbook were used (Atkins P. W., Jones L. and Laverman L., (2013), *Chemical principles : the quest for insight*, New York: W H Freeman). <sup>b</sup> Similar or identical terms with different technical meanings in different contexts are shown in bold.

## Appendix 7: Meanings of terms used in chemical kinetics<sup>a</sup>

| Term <sup>b</sup>    | Everyday language / common usage                                                                                                                                                                                                                                                                                                                                                                                                                                                                                                                                     | Context-specific scientific language                                                                                                                                                                                                                      | Clue(s)<br>(Figure S2) |
|----------------------|----------------------------------------------------------------------------------------------------------------------------------------------------------------------------------------------------------------------------------------------------------------------------------------------------------------------------------------------------------------------------------------------------------------------------------------------------------------------------------------------------------------------------------------------------------------------|-----------------------------------------------------------------------------------------------------------------------------------------------------------------------------------------------------------------------------------------------------------|------------------------|
| <b>elementary</b>    | <ul style="list-style-type: none"> <li>Relating to the rudiments of a subject: an elementary astronomy course</li> <li>Straightforward and uncomplicated</li> </ul>                                                                                                                                                                                                                                                                                                                                                                                                  | Elementary reaction/step is an individual step in a proposed reaction mechanism.                                                                                                                                                                          | 8 across               |
| <b>instantaneous</b> | <ul style="list-style-type: none"> <li>Occurring or done instantly</li> </ul>                                                                                                                                                                                                                                                                                                                                                                                                                                                                                        | Instantaneous rate is the slope (gradient) of the tangent of a graph of concentration against time.                                                                                                                                                       | 1 down                 |
| <b>order</b>         | <ul style="list-style-type: none"> <li>The arrangement or disposition of people or things in relation to each other according to a particular sequence, pattern, or method</li> <li>An authoritative command or instruction</li> <li>A particular social, political, or economic system</li> <li>A society of monks or nuns living under the same religious, moral, and social regulations and discipline; an institution; a fraternity</li> <li>The degree of complexity of an equation, expression, etc., as denoted by an ordinal number (mathematics)</li> </ul> | Order of a reaction is the power to which the concentration of a single substance is raised in a rate law.                                                                                                                                                | 12 down                |
| <b>rate</b>          | <ul style="list-style-type: none"> <li>The speed with which something moves or happens</li> <li>A fixed price paid or charged for something</li> <li>A tax on commercial land and buildings paid to a local authority (usually plural)</li> </ul>                                                                                                                                                                                                                                                                                                                    | Reaction rate is the unique rate of a chemical reaction calculated by dividing the change in concentration of a substance by the interval during which the change takes place and by taking into account the stoichiometric coefficient of the substance. | 1, 11, 15, 16, 18 down |

<sup>a</sup> Definitions are from the Oxford Dictionary. Where scientific definitions are not available in the Oxford Dictionary, definitions from the prescribed textbook were used (Atkins P. W., Jones L. and Laverman L., (2013), *Chemical principles : the quest for insight*, New York: W H Freeman). <sup>b</sup> Similar or identical terms with different technical meanings in different contexts are shown in bold.
